# Supplementary figures and images for: Green Synthesis of Lanthanum Oxide and Its Utilization in Modified Biodiesel for Optimal Performance and Exhaust Emissions of a Diesel Engine
Source: Research Square preprint supplement (doi:10.21203/rs.3.rs-7499010/v1), 2025-09-11

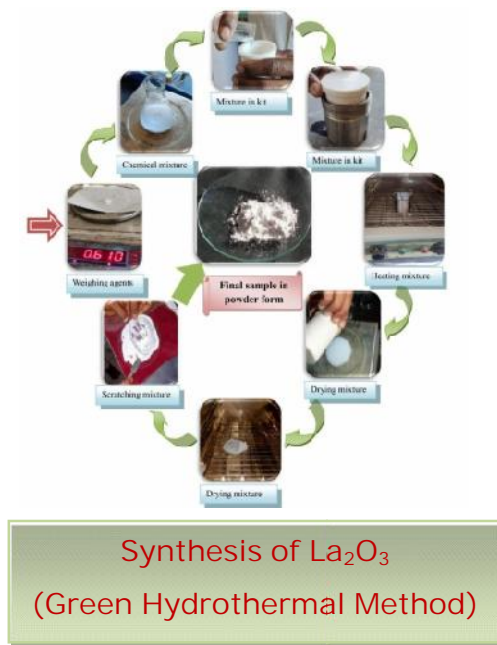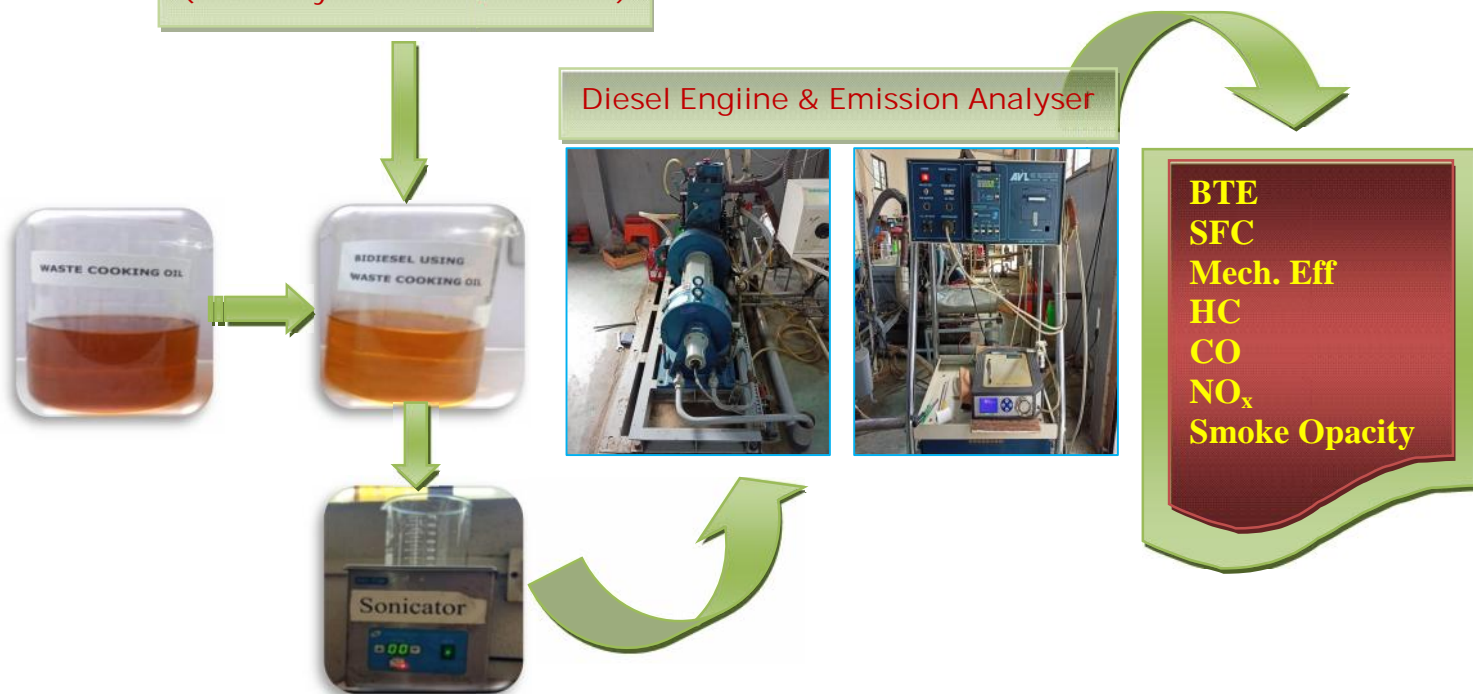

Graphical Abstract

Supplement: Supplementary file 1 [file 68387997e07e819eb0504e90.pdf]
